# Supplementary material for: 2q36.3 is associated with prognosis for oestrogen receptor-negative breast cancer patients treated with chemotherapy
Source: PubMed Central journal article supplement — Nat Commun. 2014 Jun 17;5:4051. doi: 10.1038/ncomms5051 (PMC4082638; doi:10.1038/ncomms5051), 2014-06-17
Supplement: ncomms5051-s1.pdf [file ncomms5051-s1.pdf]

**Supplementary Table 1. Summary of studies contributing to the all ER-negative breast cancers analysis.**

| Abbreviation | Study                                                                                 | Country                  | Study design                                                         | n    | nevent | Years to entry  | Years to status  | Age         | Ethical approval committee                                                                                                                                              |
|--------------|---------------------------------------------------------------------------------------|--------------------------|----------------------------------------------------------------------|------|--------|-----------------|------------------|-------------|-------------------------------------------------------------------------------------------------------------------------------------------------------------------------|
| ABCFS        | Australian Breast Cancer Family Study                                                 | Australia                | Population-based case-control study                                  | 218  | 43     | 0.8 (0.0, 3.1)  | 11.9 (1.1, 15.0) | 38.6 (6.5)  | The University of Melbourne Health Sciences Human Ethics Sub-Committee (HESC)                                                                                           |
| ABCS         | Amsterdam Breast Cancer Study                                                         | Netherlands              | Hospital-based consecutive cases; population-based controls          | 76   | 9      | 0.7 (0.0, 6.6)  | 3.2 (0.6, 10.3)  | 41.2 (9.4)  | Leiden University Medical Center (LUMC) Commissie Medische Ethiek and Protocol Toetsingscommissie van het Nederlands Kanker Instituut/Antoni van Leeuwenhoek Ziekenhuis |
| BBC          | Bavarian Breast Cancer Cases and Controls                                             | Germany                  | Hospital based cases; population based controls                      | 40   | 2      | 0.0 (0.0, 6.2)  | 4.1 (0.0, 12.3)  | 57.4 (15.8) | Friedrich-Alexander-Universitat Erlangen-Nurnberg Medizinische Fakultat Ethik-Commission                                                                                |
| HEBCS        | Helsinki Breast Cancer Study                                                          | Finland                  | Hospital-based case-control study and additional familial cases      | 213  | 2      | 0.0 (0.0, 10.6) | 6.0 (0.3, 15.0)  | 55.0 (13.8) | Helsingin ja uudenmaan sairaanhoitopiiri (Helsinki University Central Hospital Ethics Committee)                                                                        |
| KARBAC       | Karolinska Breast Cancer Study                                                        | Sweden                   | Population and hospital-based cases; geographically matched controls | 61   | 15     | 0.0 (0.0, 0.0)  | 7.3 (1.1, 11.1)  | 57.0 (11.1) | Lokala Forskningsetikkommitten Nord                                                                                                                                     |
| KBCP         | Kuopio Breast Cancer Project                                                          | Finland                  | Population-based prospective clinical cohort                         | 89   | 29     | 0.0 (0.0, 0.0)  | 11.2 (0.8, 15.0) | 55.7 (14.5) | Pohjois-Savon Sairraanhoitopiirin Kuntayhtyma Tutkimuseettinen Toimikunta                                                                                               |
| KConFab      | Kathleen Cuningham Foundation Consortium for research into Familial Breast Cancer     | Australia and New Zeland | Clinic-based recruitment of familial breast cancer patients          | 46   | 3      | 3.4 (0.0, 14.6) | 8.4 (1.5, 15.0)  | 42.8 (8.4)  | The Queensland Institute of Medical Research Human Research Ethics Committee (QIMR-HREC)                                                                                |
| LMBC         | Leuven Multidisciplinary Breast Centre                                                | Belgium                  | Hospital-based case-control study                                    | 376  | 16     | 0.0 (0.0, 14.3) | 3.0 (0.1, 15.0)  | 54.2 (12.8) | Commissie Medische Ethiek van de Universitaire Ziekenhuizen Kuleuven                                                                                                    |
| MARIE        | Mammary Carcinoma Risk Factor Investigation                                           | Germany                  | Population-based case-control study                                  | 369  | 61     | 0.2 (0.0, 4.4)  | 5.7 (0.2, 9.0)   | 61.1 (6.7)  | Ruprecht-Karls-Universitat Medizinische Fakultat Heidelberg Ethikkommission                                                                                             |
| MCCS         | Melbourne Collaborative Cohort Study                                                  | Australia                | Population-based prospective cohort study                            | 111  | 12     | 0.0 (0.0, 13.6) | 8.9 (0.1, 15.0)  | 62.0 (8.4)  | The Cancer Council Victoria Human Research Ethics Committee                                                                                                             |
| MEC          | Multi-ethnic Cohort                                                                   | USA                      | Prospective cohort study: nested case-control                        | 85   | 11     | 1.4 (0.0, 9.7)  | 8.2 (1.2, 15.0)  | 63.8 (9.5)  | Institutional Review Boards of the University of Hawaii and University of Southern California                                                                           |
| NBCS         | Norwegian Breast Cancer Study                                                         | Norway                   | Hospital-based case-control study                                    | 17   | 6      | 0.0 (0.0, 0.2)  | 9.8 (2.7, 14.2)  | 56.6 (15.4) | Regional Komite for Medisinsk Forskningsetikk (Helseregion III Universitetet I Bergen, Universitetet I Oslo, Helseregion Sor, Helseregion II, and Ost-Norge)            |
| OBCS         | Oulu Breast Cancer Study                                                              | Finland                  | Hospital-based case-control study                                    | 97   | 10     | 0.0 (0.0, 2.4)  | 2.4 (0.1, 8.1)   | 55.7 (12.7) | Ethical Committee of the Medical Faculty of University of Oulu and Northern Ostrobothnia Hospital District Ethical Committee                                            |
| OFBCR        | Ontario Familial Breast Cancer Registry                                               | Canada                   | Population-based familial case-control study                         | 243  | 34     | 1.7 (0.1, 12.7) | 7.5 (0.4, 15.0)  | 50.9 (10.6) | Mount Sinai Hospital Research Ethics Board                                                                                                                              |
| ORIGO        | Leiden University Medical Centre Breast Cancer Study                                  | Netherlands              | Hospital-based prospective cohort study                              | 68   | 15     | 0.5 (0.0, 3.7)  | 5.1 (0.5, 11.3)  | 52.4 (9.7)  | Medical ethics committee of the Leiden University Medical Centre                                                                                                        |
| pKARMA       | Karolinska Mammography Project for Risk Prediction of Breast Cancer - prevalent cases | Sweden                   | Case-control study                                                   | 663  | 11     | 4.9 (1.3, 8.4)  | 5.7 (2.0, 10.0)  | 56.3 (10.9) | Regionala Etikprovningnamnden i Stockholm (Regional Ethical Review Board in Stockholm)                                                                                  |
| RBCS         | Rotterdam Breast Cancer Study                                                         | Netherlands              | Hospital based case-control study, Rotterdam area                    | 113  | 29     | 0.2 (0.0, 9.7)  | 5.3 (0.7, 15.0)  | 42.5 (10.9) | Medische Ethische Toetsings Commissie Erasmus Medisch Centrum                                                                                                           |
| SASBAC       | Singapore and Sweden Breast Cancer Study                                              | Sweden                   | Population-based case-control study                                  | 144  | 11     | 5.0 (3.4, 6.5)  | 12.5 (4.3, 15.0) | 61.3 (6.5)  | Regionala Etikprovningnamnden i Stockholm (Regional Ethical Review Board in Stockholm)                                                                                  |
| SEARCH       | Study of Epidemiology and Risk factors in Cancer Heredity                             | UK                       | Population-based case-control study                                  | 1153 | 199    | 1.3 (0.0, 11.1) | 5.4 (0.7, 15.0)  | 52.2 (9.5)  | Multi Centre Research Ethics Committee (MREC)                                                                                                                           |
| SKKDKFZS     | Städtisches Klinikum Karlsruhe Deutsches Krebsforschungszentrum Study                 | Germany                  | Hospital-based breast cancer cohort                                  | 119  | 18     | 0.0 (0.0, 0.4)  | 4.0 (0.2, 10.0)  | 57.5 (12.0) | Ethics Committee of the Medical Faculty of Heidelberg                                                                                                                   |

Summary of 20 studies with all estrogen-receptor negative breast cancer cases (including studies missing information on chemotherapy) with at least one death due to breast cancer in a 15-year follow-up. nevent: Number of deaths due to breast cancer; Years to entry: Years to study entry, median (min, max); Years to last follow-up: Years to last follow-up truncated at 15 years, median (min, max); Age: Age of diagnosis of index cancer in years (mean, standard deviation)

**Supplementary Table 2. Summary of studies contributing to the subset of ER-negative breast cancers treated with chemotherapy.**

| Abbreviation | Study                                                                 | Country     | Study design                                                         | n   | nevent | Years to entry  | Years to status  | Age         |
|--------------|-----------------------------------------------------------------------|-------------|----------------------------------------------------------------------|-----|--------|-----------------|------------------|-------------|
| ABCFS        | Australian Breast Cancer Family Study                                 | Australia   | Population-based case-control study                                  | 149 | 32     | 0.7 (0.1, 2.7)  | 11.9 (1.1, 15.0) | 38.4 (6.1)  |
| ABCS         | Amsterdam Breast Cancer Study                                         | Netherlands | Hospital-based consecutive cases; population-based controls          | 66  | 9      | 0.7 (0.0, 6.6)  | 2.5 (0.6, 9.9)   | 39.8 (8.0)  |
| BBC          | Bavarian Breast Cancer Cases and Controls                             | Germany     | Hospital based cases; population based controls                      | 33  | 2      | 0.0 (0.0, 4.1)  | 4.1 (0.0, 6.7)   | 57.2 (15.2) |
| HEBCS        | Helsinki Breast Cancer Study                                          | Finland     | Hospital-based case-control study + additional familial cases        | 115 | 1      | 0.0 (0.0, 4.3)  | 5.3 (0.3, 11.8)  | 50.7 (11.8) |
| KARBAC       | Karolinska Breast Cancer Study                                        | Sweden      | Population and hospital-based cases; geographically matched controls | 35  | 8      | 0.0 (0.0, 0.0)  | 8.2 (1.1, 11.1)  | 50.2 (6.1)  |
| KBCP         | Kuopio Breast Cancer Project                                          | Finland     | Population-based prospective clinical cohort                         | 28  | 11     | 0.0 (0.0, 0.0)  | 12.4 (1.3, 15.0) | 43.6 (7.5)  |
| LMBC         | Leuven Multidisciplinary Breast Centre                                | Belgium     | Hospital-based case-control study                                    | 301 | 9      | 0.0 (0.0, 14.3) | 3.0 (0.1, 15.0)  | 51.8 (11.2) |
| MARIE        | Mammary Carcinoma Risk Factor Investigation                           | Germany     | Population-based case-control study                                  | 279 | 53     | 0.2 (0.0, 4.3)  | 5.5 (0.3, 9.0)   | 60.3 (6.5)  |
| NBCS         | Norwegian Breast Cancer Study                                         | Norway      | Hospital-based case-control study                                    | 4   | 2      | 0.0 (0.0, 0.0)  | 10.1 (6.8, 14.2) | 47.6 (13.9) |
| OFBCR        | Ontario Familial Breast Cancer Registry                               | Canada      | Population-based familial case-control study                         | 101 | 10     | 1.4 (0.1, 5.2)  | 7.9 (2.1, 13.2)  | 49.5 (8.5)  |
| RBCS         | Rotterdam Breast Cancer Study                                         | Netherlands | Hospital based case-control study, Rotterdam area                    | 76  | 18     | 0.2 (0.0, 8.2)  | 4.8 (0.9, 15.0)  | 40.8 (8.2)  |
| SASBAC       | Singapore and Sweden Breast Cancer Study                              | Sweden      | Population-based case-control study                                  | 34  | 3      | 4.8 (3.5, 6.3)  | 12.3 (4.3, 15.0) | 57.7 (4.8)  |
| SEARCH       | Study of Epidemiology and Risk factors in Cancer Heredity             | UK          | Population-based case-control study                                  | 505 | 107    | 1.1 (0.2, 4.7)  | 5.8 (0.7, 15.0)  | 49.6 (9.3)  |
| SKKDKFZS     | Städtisches Klinikum Karlsruhe Deutsches Krebsforschungszentrum Study | Germany     | Hospital-based breast cancer cohort                                  | 78  | 14     | 0.0 (0.0, 0.4)  | 3.6 (0.2, 10.0)  | 53.6 (11.6) |

Summary of 14 studies with estrogen-receptor negative breast cancer cases treated with chemotherapy and at least one death due to breast cancer in a 15-year follow-up. nevent: Number of deaths due to breast cancer; Years to entry: Years to study entry, median (min, max); Years to last follow-up: Years to last follow-up truncated at 15 years, median (min, max); Age: Age of diagnosis of index cancer in years (mean, standard deviation)

**Supplementary Table 3. Summary of Asian replication studies.**

| Abbreviation | Study                                                                | Country  | Study design                       | n   | nevent | Years to entry  | Years to status | Age         | Ethical approval committee                                                           |
|--------------|----------------------------------------------------------------------|----------|------------------------------------|-----|--------|-----------------|-----------------|-------------|--------------------------------------------------------------------------------------|
| HERPACC      | Hospital-based Epidemiologic Research Program at Aichi Cancer Center | Japan    | Hospital-based case-controls study | 76  | 13     | 0.0 (0.0, 0.0)  | 7.2 (0.4, 9.8)  | 51.8 (10.2) | Institutional Ethical Committee at the Aichi Cancer Center                           |
| MYBRCA       | Malaysian Breast Cancer Genetic Study                                | Malaysia | Hospital-based case-control study  | 177 | 34     | 1.0 (0.0, 11.4) | 4.5 (0.3, 14.9) | 48.1 (9.8)  | University Malaya Medical Centre Ethics Committee                                    |
| SEBCS        | Seoul Breast Cancer Study                                            | Korea    | Hospital-based case-control study  | 157 | 4      | 0.0 (0.0, 0.3)  | 4.0 (0.6, 5.2)  | 48.6 (9.7)  | Seoul National University College of Medicine/Seoul National University Hospital IRB |
| TWBCS        | Taiwanese Breast Cancer Study                                        | Taiwan   | Hospital-based case-control study  | 112 | 2      | 0.0 (0.0, 0.0)  | 1.4 (0.1, 7.7)  | 51.7 (10.0) | Human Subject Research Ethics Committee/IRB Academia Sinica                          |

Summary of four Asian studies with estrogen-receptor negative breast cancer cases treated with chemotherapy and at least one death due to breast cancer in a 15-year follow-up. nevent: Number of deaths due to breast cancer; Years to entry: Years to study entry, median (min, max); Years to last follow-up: Years to last follow-up truncated at 15 years, median (min, max); Age: Age of diagnosis of index cancer in years (mean, standard deviation)
